# Supplementary material for: Phytoprofiling of Sorbus L. Inflorescences: A Valuable and Promising Resource for Phenolics
Source: MDPI journal article supplement (doi:10.3390/plants11243421), 2022-12-07
Supplement: s1 [file s1]

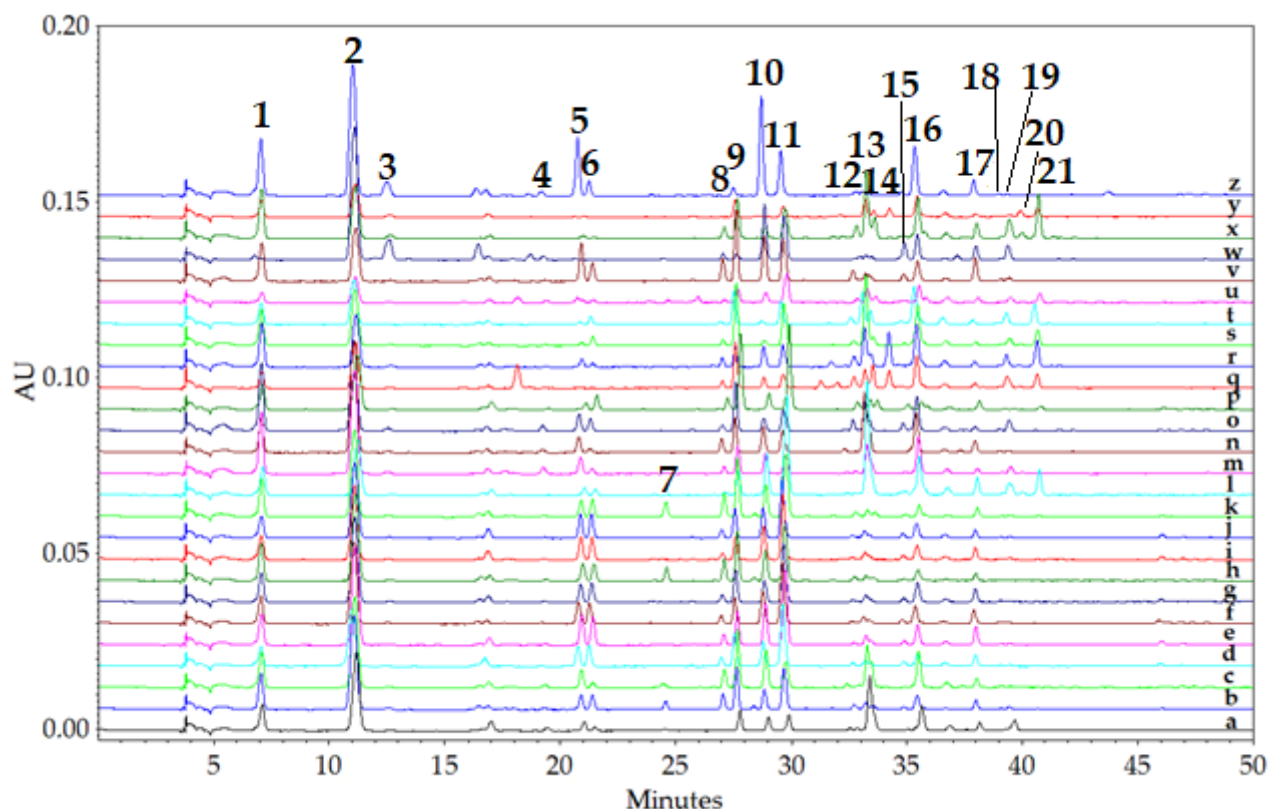

**Figure S1.** *Sorbus* L. inflorescences phytochemical HPLC profiles ( $\lambda=350$  nm): z – *S. amurensis*; y – *S. aria*; x – *S. arranensis*; w – *S. commixta*; v – *S. discolor*; u – *S. x hostii*; t – *S. hybrida* subsp. Gotlandica; s – *S. hybrida* subsp. Persecta; r – *S. lancifolia*; q – *S. semi-incisa*; p – 'Alaja Krupnaja'; o – 'Carpet of Gold'; n – 'Chamsis louing'; m – 'Coral Beauty'; l – 'Edulis'; k – 'Granatnaja'; j – 'Koncentra'; i – 'Krasnaja Nevezisnaskaja'; h – 'Miciurinskaja Desertnaja'; g – 'Nevezinskaja'; f – 'Nevezinskaja Zolotistaja'; e – 'Nevezinskaja Zoltaja'; d – 'Oranzevaja'; c – 'Pink Queen'; b – 'Titan'; a – 'Yellow Upright'.

1 - Neochlorogenic acid; 2 - Chlorogenic acid; 3 - Cryptochlorogenic acid; 4 - Caffeoylshikimic acid; 5 - Quercetin dihexoside 1; 6 - Quercetin dihexoside 2; 7 - Quercetin pentose hexoside; 8 - Quercetin dihexoside 3; 9 - Rutin; 10 - Hyperoside; 11 - Isoquercitrin; 12 - Kaempferol coumaroyl glucoside; 13 - Quercetin 3-O-malonylglucoside; 14 - Isorhamnetin rutinoside; 15 - Astragalin; 16 - Dicafeoylquinic acid derivative 1; 17 - Sexangularetin derivative; 18 - Dicafeoylquinic acid derivative 2; 19 - Kaempferol acetyl hexoside; 20 - Dicafeoylquinic acid derivative 3; 21 - Isorhamnetin acetyl hexoside.

**Table S1.** Identified phenolic compounds of *Sorbus* L. inflorescences.

| Peak No. | Retention<br>time,min | Compound                           | $\lambda_{\text{max}}$ | UPLC-ESI-MS        |               |
|----------|-----------------------|------------------------------------|------------------------|--------------------|---------------|
|          |                       |                                    |                        | [M-H] <sup>-</sup> | Fragments     |
| 1        | 7.11                  | Neochlorogenic acid                | 325                    | 353                | 191           |
| 2        | 11.20                 | Chlorogenic acid                   | 325                    | 353                | 191           |
| 3        | 12.71                 | Cryptochlorogenic acid             | 325                    | 353                | 191           |
| 4        | 19.40                 | Caffeoylshikimic acid              | 328                    | 335                | 135, 161, 179 |
| 5        | 20.97                 | Quercetin dihexoside 1             | 253, 354               | 625                | 301           |
| 6        | 21.43                 | Quercetin dihexoside 2             | 253, 354               | 625                | 301           |
| 7        | 24.69                 | Quercetin pentose hexoside         | 255, 354               | 595                | 301           |
| 8        | 27.16                 | Quercetin dihexoside 3             | 253, 354               | 609                | 301           |
| 9        | 27.74                 | Rutin                              | 253, 354               | 609                | 301           |
| 10       | 28.96                 | Hyperoside                         | 253, 354               | 463                | 301           |
| 11       | 29.79                 | Isoquercitrin                      | 253, 354               | 463                | 301           |
| 12       | 32.83                 | Kaempferol coumaroyl glucoside     | 264, 346               | 593                | 285           |
| 13       | 33.27                 | Quercetin 3-O-malonylglucoside     | 253, 354               | 549                | 301, 505      |
| 14       | 33.63                 | Isorhamnetin rutinoside            | 253, 354               | 623                | 315, 477      |
| 15       | 34.93                 | Astragalin                         | 264, 346               | 447                | 285           |
| 16       | 35.51                 | Dicaffeoylquinic acid derivative 1 | 327                    | 515                | 191, 353      |
| 17       | 38.05                 | Sexangularetin derivative          | 270, 325, 354          | 519                | 299, 315      |
| 18       | 39.14                 | Dicaffeoylquinic acid derivative 2 | 326                    | 515                | 191, 353      |
| 19       | 39.46                 | Kaempferol acetyl hexoside         | 264, 346               | 489                | 285           |
| 20       | 40.00                 | Dicaffeoylquinic acid derivative 3 | 327                    | 515                | 191, 353      |
| 21       | 40.73                 | Isorhamnetin acetyl hexoside       | 253, 354               | 519                | 315           |
